# Supplementary material for: Identification of a p53-repressed gene module in breast cancer cells
Source: PubMed Central journal article supplement (PMC5593526; doi:10.18632/oncotarget.19608), 2017-07-26
Supplement: oncotarget-08-55821-s001.pdf [file oncotarget-08-55821-s001.pdf]

# Identification of a p53-repressed gene module in breast cancer cells

## SUPPLEMENTARY MATERIALS

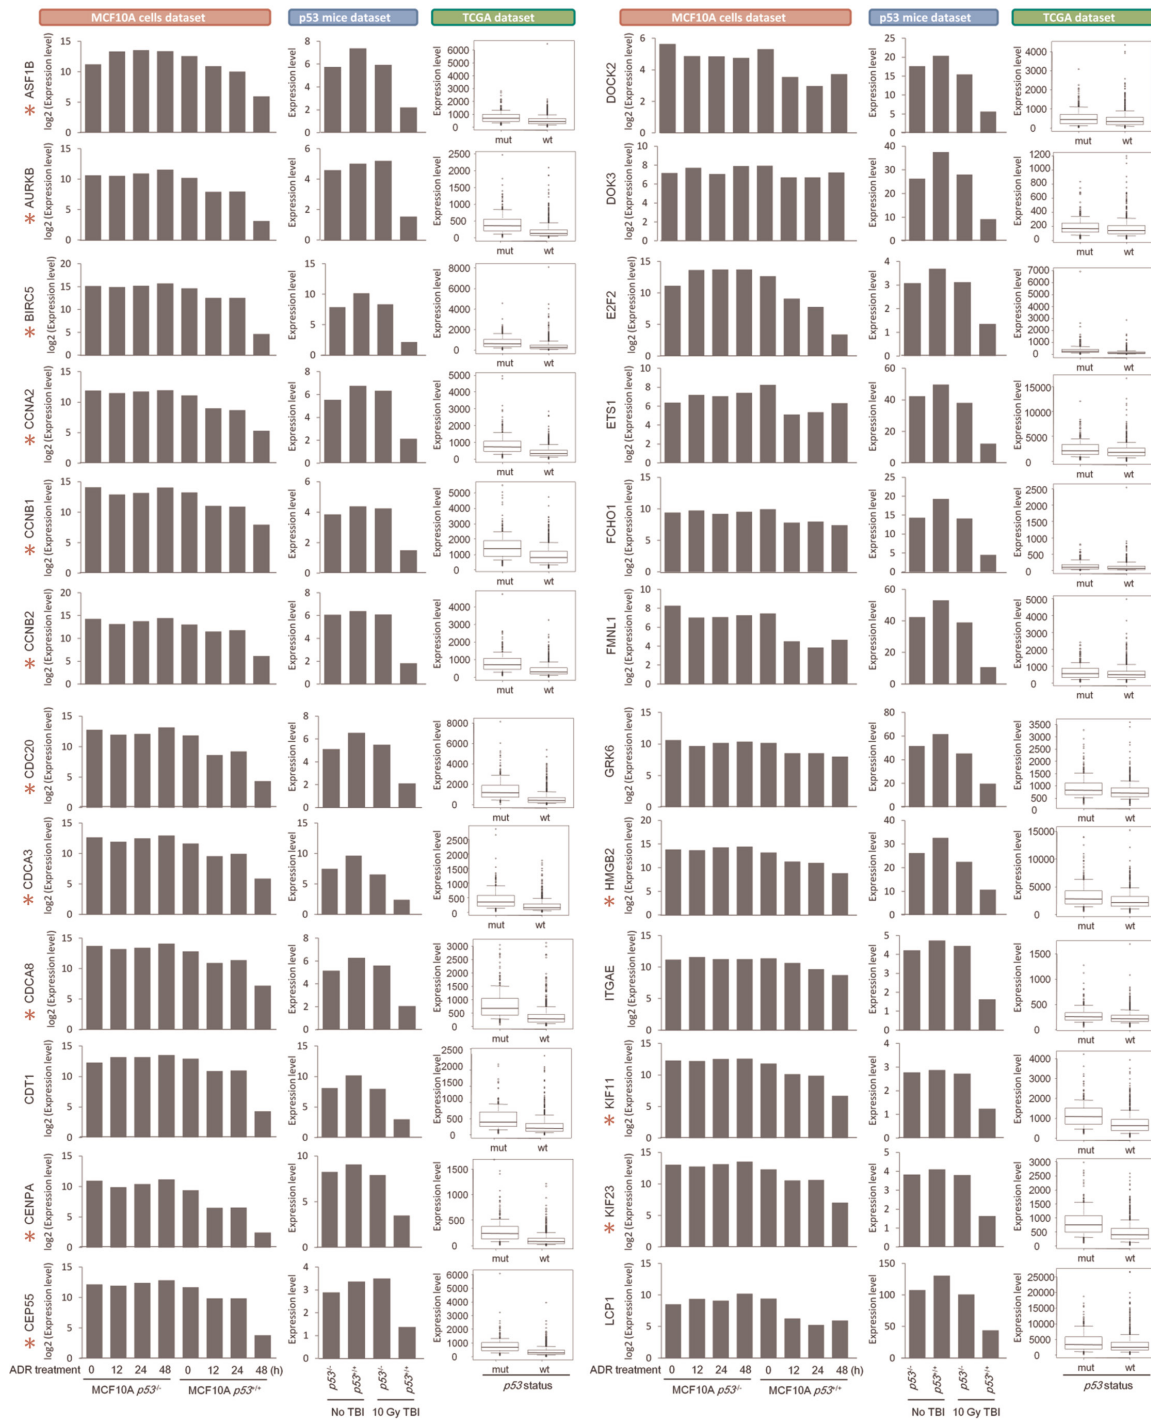

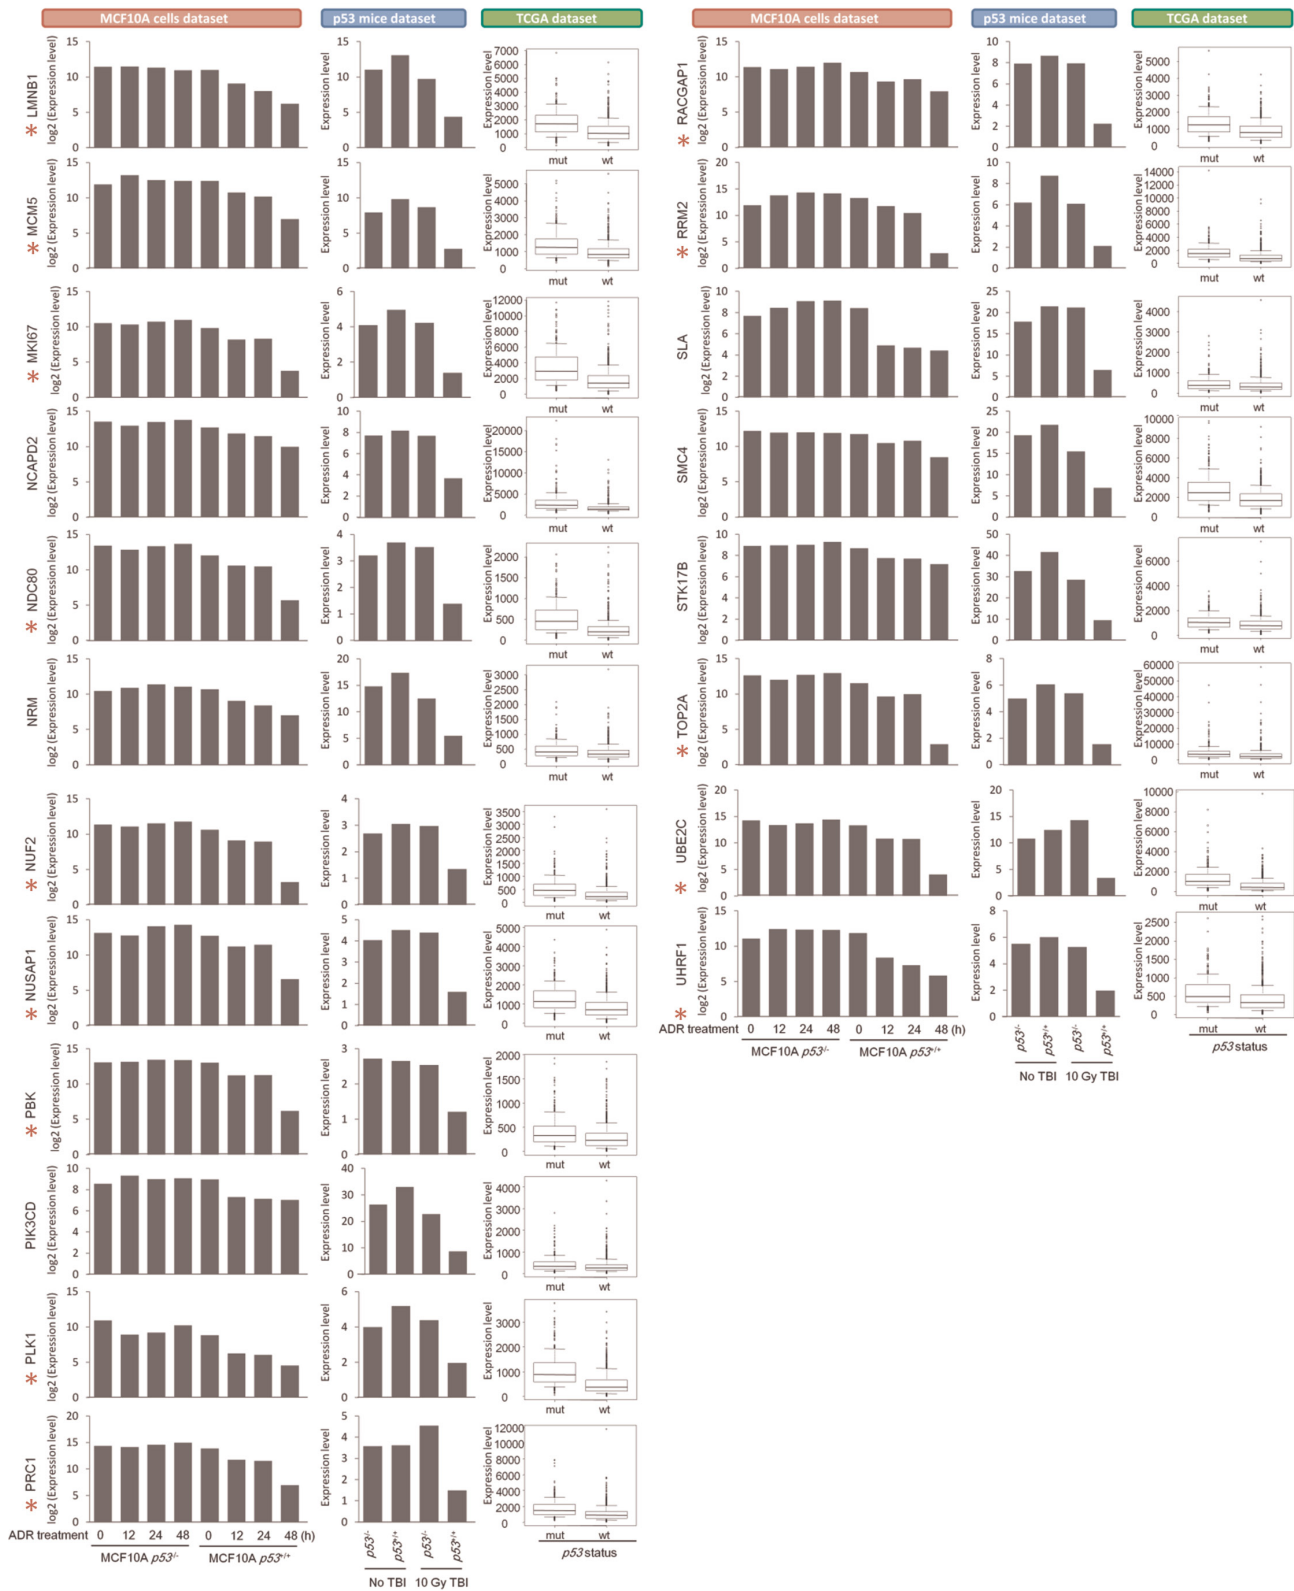

**Supplementary Figure 1: Identification of 44 p53-repressed gene candidates.** The results obtained from the MCF10A cells dataset (Figure 1A), p53 mice dataset (Figure 1B), and TCGA dataset (Figure 1C) of 44 p53-repressed gene candidates are shown. \*: p53-repressed gene module.

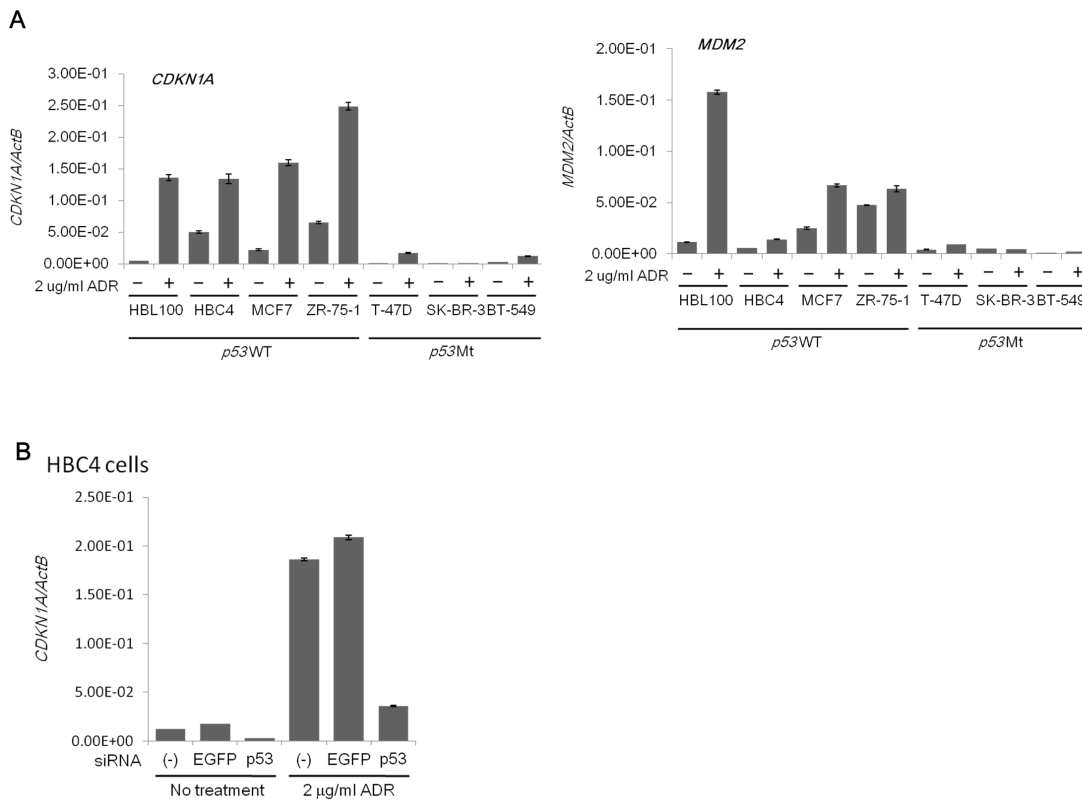

**Supplementary Figure 2: The expression dynamics of p53-induced genes under genotoxic stress condition.** (A) Indicated breast cancer cells were treated with 2  $\mu$ g/ml ADR for 2 hours. Forty-eight hours after treatment, the expression level of *p21/CDKN1A* (left) and *MDM2* (right) was determined using qPCR analysis. The data are normalized against  $\beta$ -actin and presented as the mean $\pm$ SD from three independent experiments. (B) At 24 hours after transfection of indicated siRNA, HBC4 cells were treated with 2  $\mu$ g/ml ADR for 2 hours. Forty-eight hours after treatment, the expression level of *p21/CDKN1A* was determined using qPCR analysis. The data are normalized by  $\beta$ -actin and presented as the mean $\pm$ SD from three independent experiments.

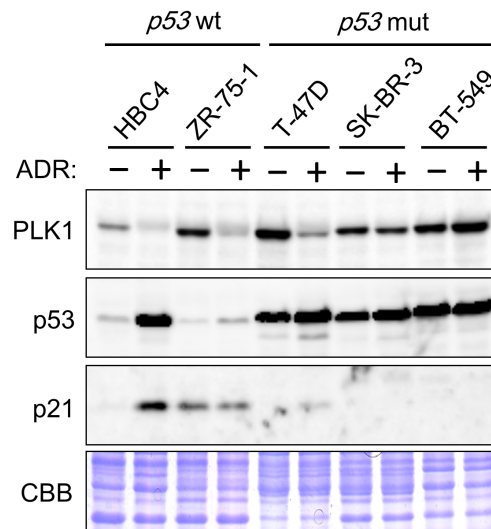

**Supplementary Figure 3: Effect of ADR on the regulation of PLK1 expression.** Indicated breast cancer cells were treated with 2  $\mu$ g/ml ADR for 2 hours. Forty-eight hours after treatment, the expression level of indicated proteins was examined by western blotting.

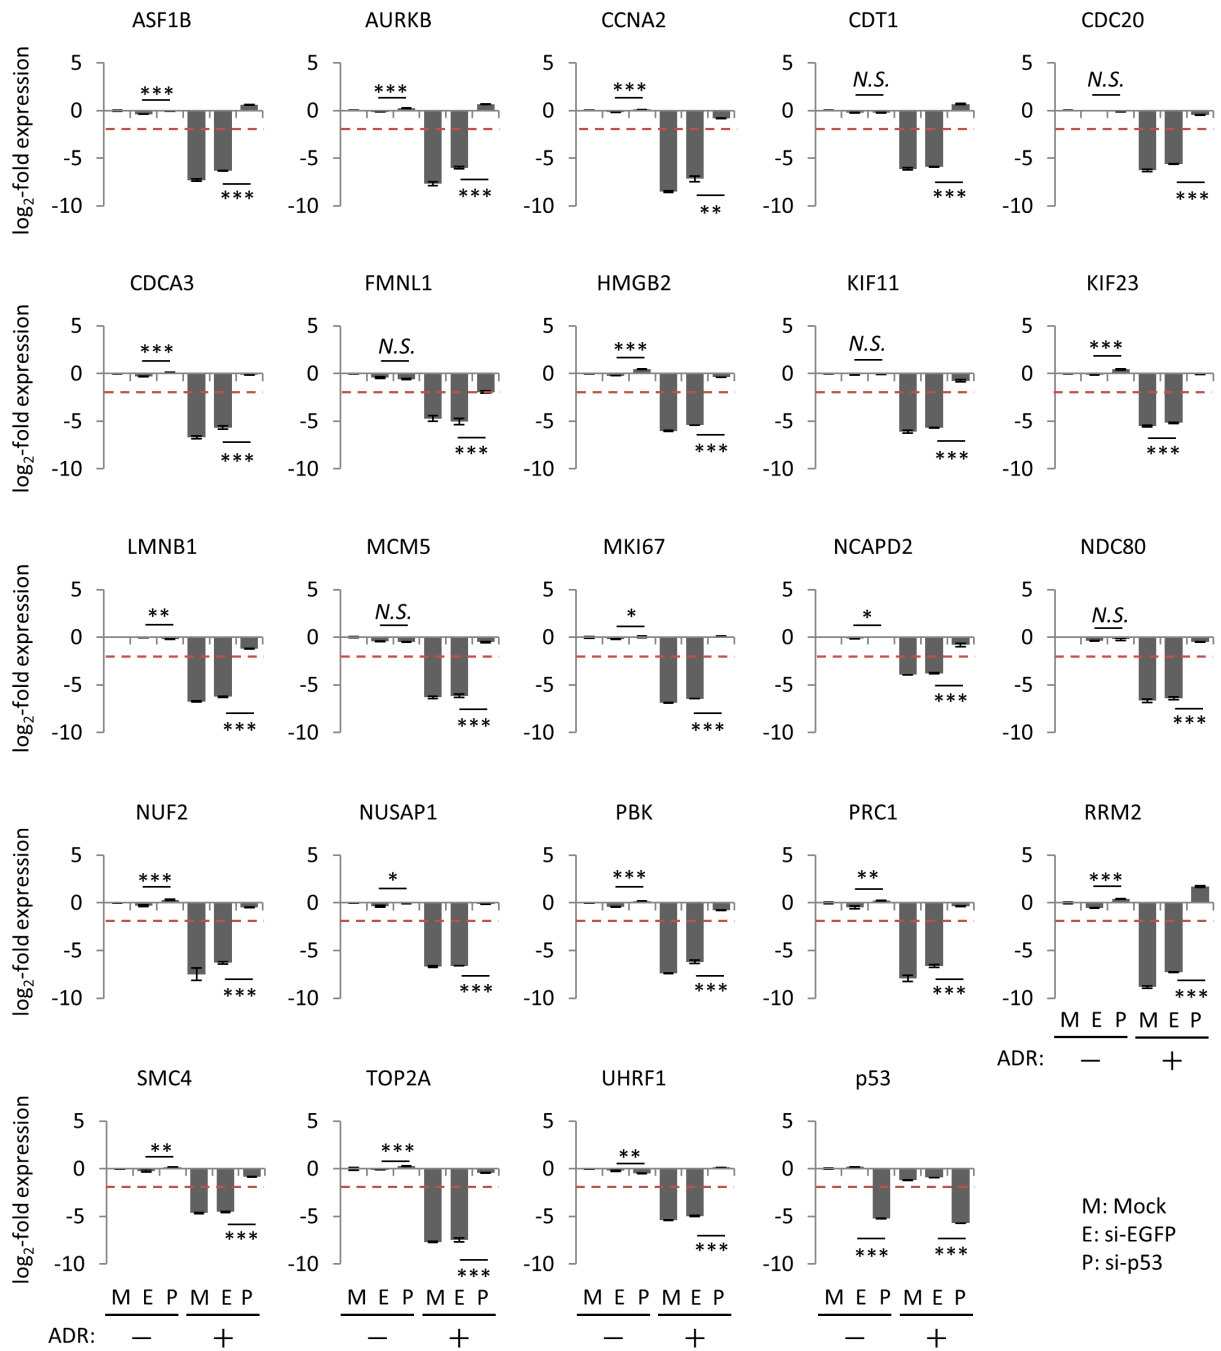

**Supplementary Figure 4: Effect of p53 knockdown on the regulation of common p53-repressed genes.** Additional data from Figure 3 are shown. The data are presented as the mean±SD from three independent experiments. The red dotted line shows cutoff value. \* $P < 0.05$ , \*\* $P < 0.01$ , \*\*\* $P < 0.001$ , *N.S.*, not statistically significant.

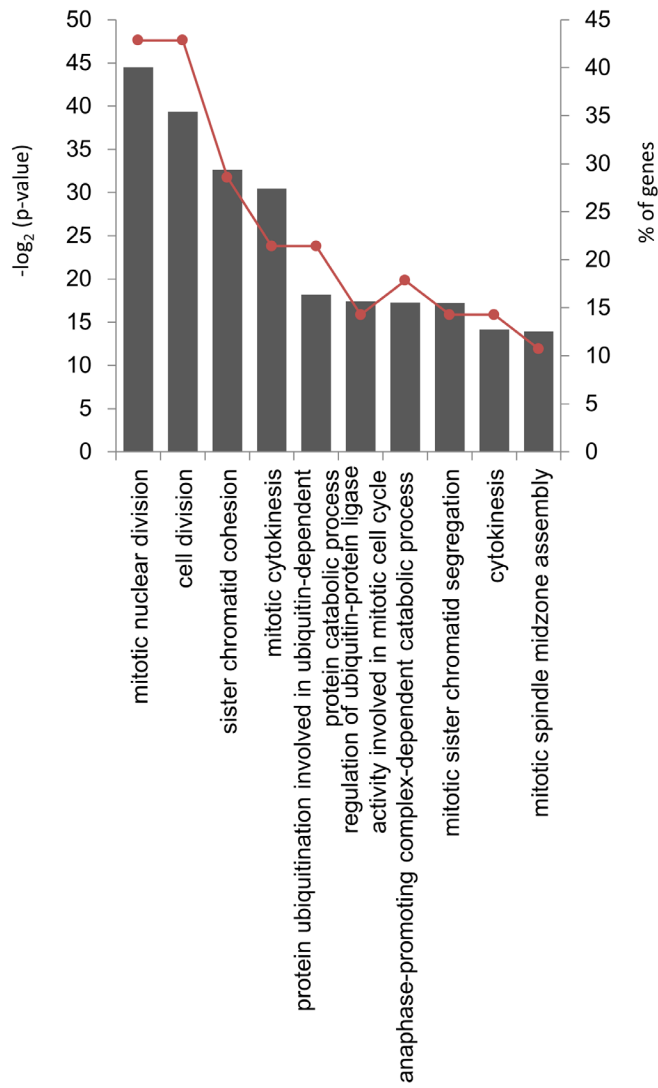

**Supplementary Figure 5: Gene ontology analysis of the p53-repressed gene module.** Gene ontology analysis by DAVID Functional Annotation tool is shown. Bar:  $-\log_2(P\text{-value})$ . Polygonal line: % of the p53-repressed gene module elements included.

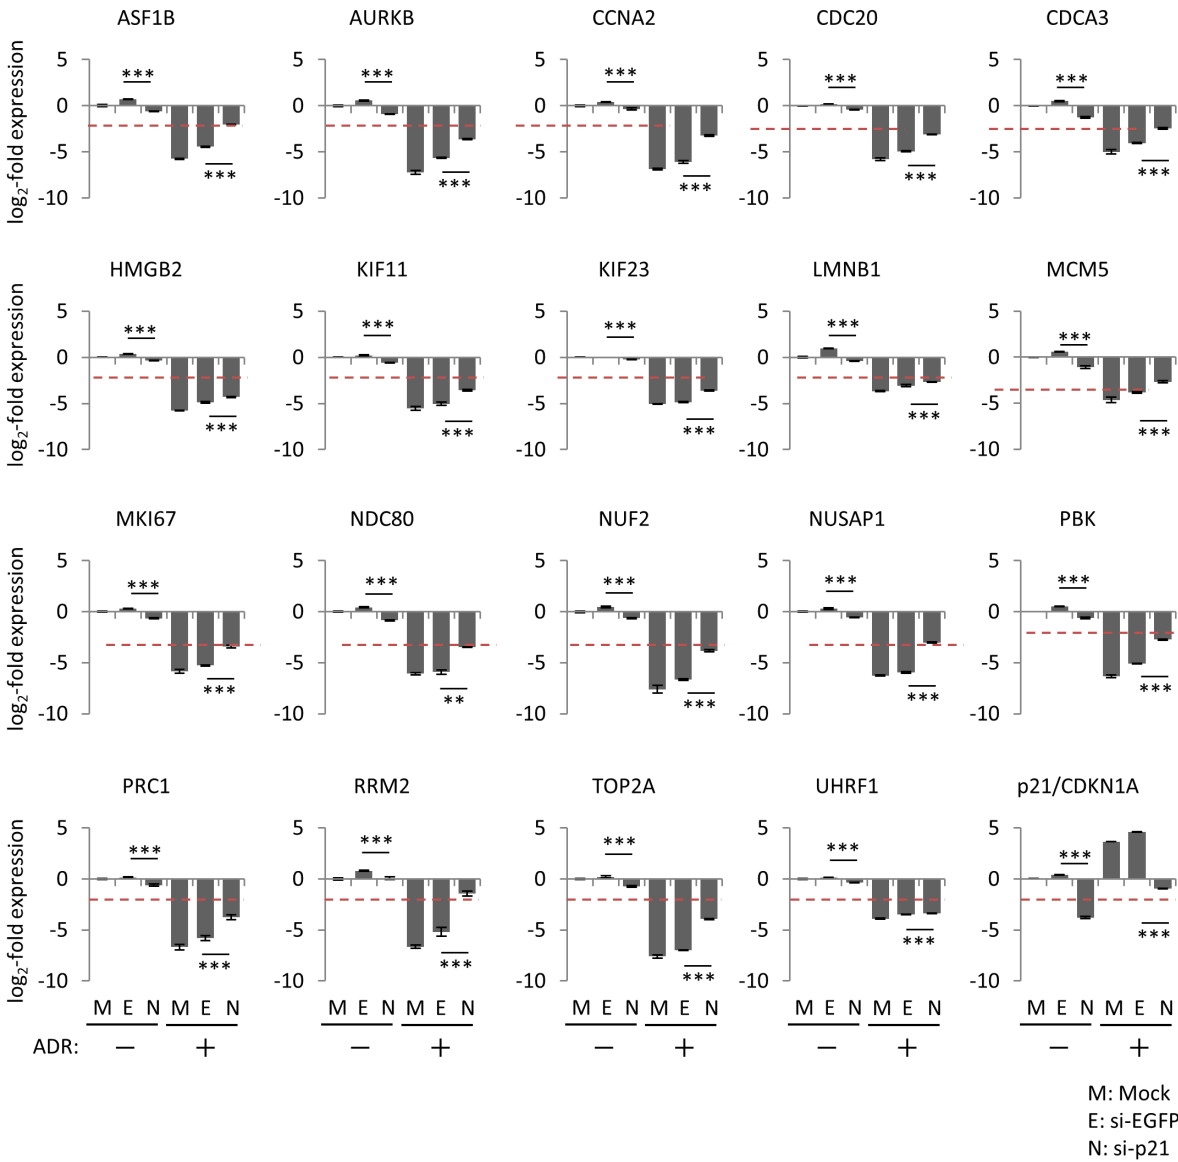

**Supplementary Figure 6: Effect of p21/CDKN1A knockdown on the regulation of p53-repressed gene module.** Additional data from Figure 7 are shown. The data are presented as the mean±SD from three independent experiments. The red dotted line shows the cutoff value. \*\* $P < 0.01$ , \*\*\* $P < 0.001$ , *N.S.*, not statistically significant.

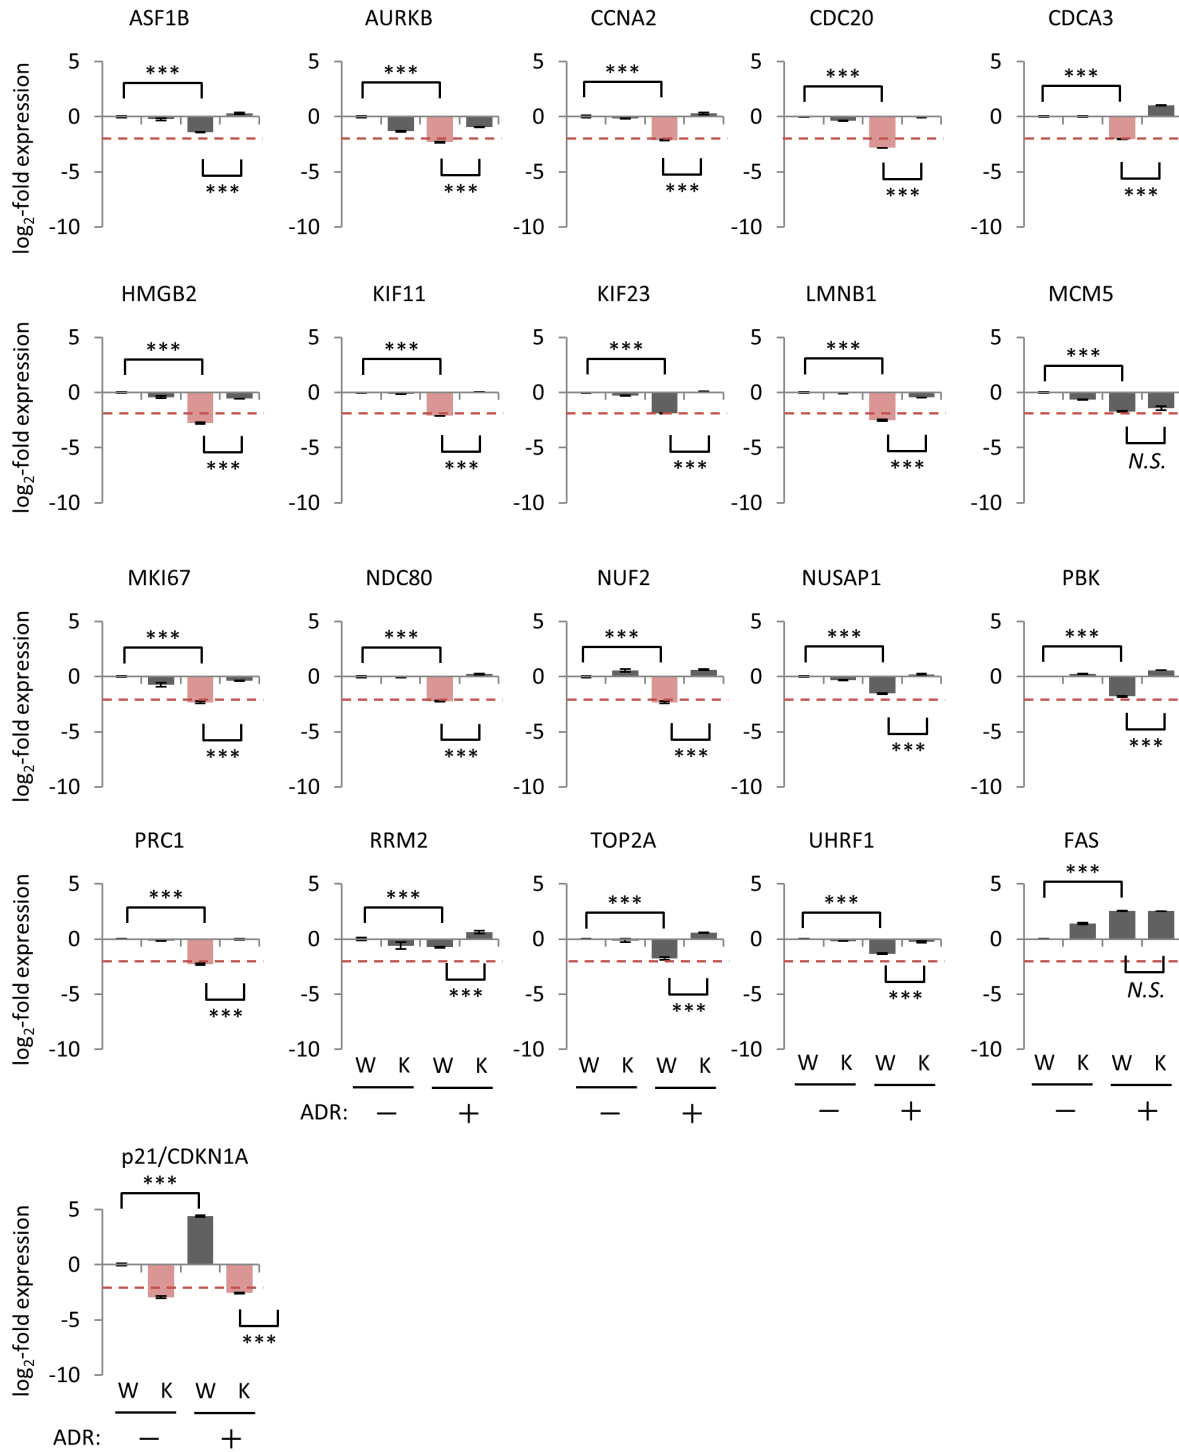

**Supplementary Figure 7: Effect of p21/CDKN1A knockout on the regulation of p53-repressed gene module.** Additional data from Figure 8 are shown. The data are presented as the mean±SD from three independent experiments. The red dotted line shows the cutoff value. Red graph: lower than cutoff value. \*\*\* $P < 0.001$ , N.S., not statistically significant.

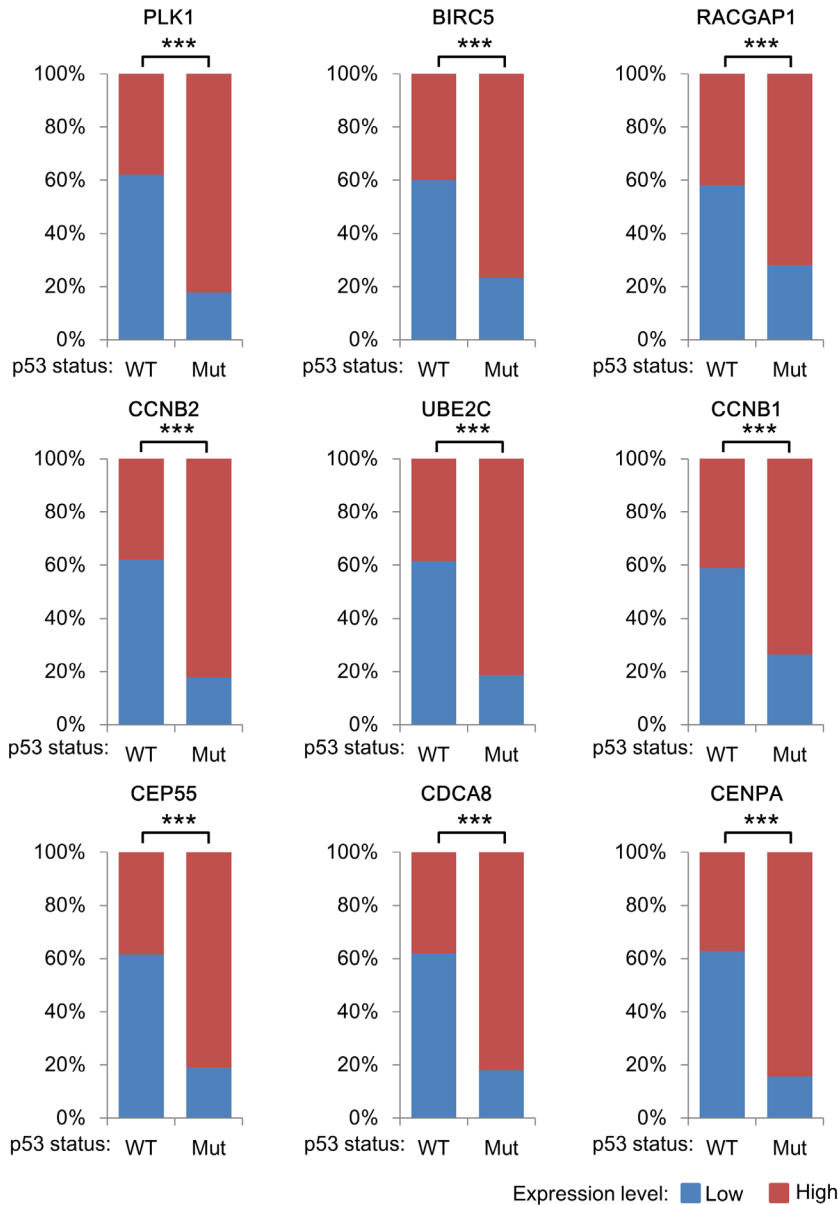

**Supplementary Figure 8: Correlation between the expression levels of p53-repressed genes and p53 status.** The proportion of high and low level expression groups for each gene in breast invasive carcinoma patients harboring either wild-type p53 or mutated p53 is shown. As presented in Figure 9, the breast cancer patients were subdivided into high (n = 546) or low (n = 547) groups according to the expression level of the indicated genes (cutoff: the median mRNA expression level of each gene). Breast cancer patients harboring wild-type p53; n = 795. Breast cancer patients harboring mutated p53; n = 298. \*\*\*; Fisher's exact test,  $P < 0.001$ .



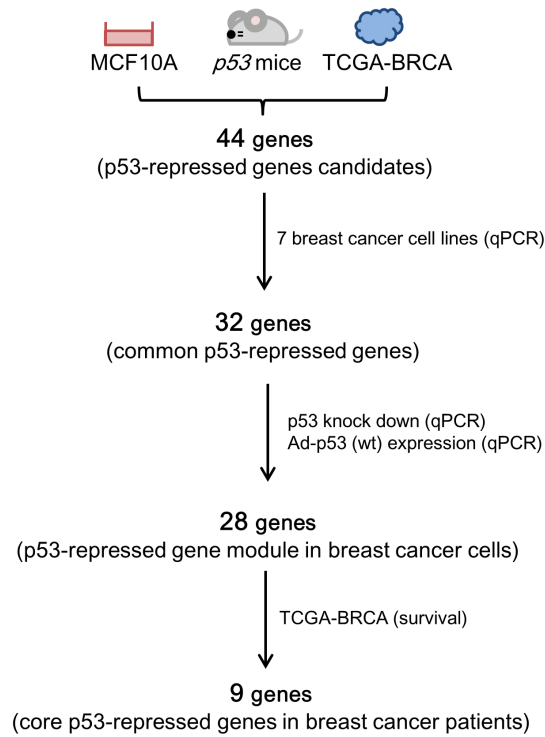

**Supplementary Figure 9: Schematics of p53-repressed gene module screen.** Schematics of our screen are illustrated.

**Supplementary Table 1: Transcriptome data obtained from ADR-treated MCF10A p53<sup>+/+</sup> cells and p53<sup>-/-</sup> cells**

**Supplementary Table 2: Transcriptome data obtained from X-ray-irradiated p53<sup>+/+</sup> mice and p53<sup>-/-</sup> mice**

**Supplementary Table 3: Transcriptome data obtained from BRCA harboring wild-type p53 and p53 mutations in TCGA dataset**

**Supplementary Table 4: A list of p53-mediated genes**

**Supplementary Table 5: Primer sequences used for qPCR analysis**

**For Supplementary Tables see in Supplementary Files.**
